# Supplementary material
Source: PubMed Central journal article supplement (PMC4548315)
Supplement: ajtr0007-1227-f7.pdf [file ajtr0007-1227-f7.pdf]

## Preservation of prostate tissue in fidelity

**Supplementary Table 1.** Sequences of primers used for real time PCR assay

| Name             | Sequence (5'-3')       |
|------------------|------------------------|
| GAPDH-F          | AGTCCCAGAAACAGGAGGT    |
| GAPDH-R-88 bp    | AGAGCGCGAAAGGAAAGAA    |
| GAPDH-R-270 bp   | GTTAGTCACCGGCAGGCTTT   |
| GAPDH-R-420 bp   | CACAAGAGGACCTCCATAAACC |
| GAPDH-R-486 bp   | ACCCATGACTCAGCTTCTCC   |
| GAPDH-R-693 bp   | GTTTCCGGAAGACGGAATG    |
| GAPDH-R-817 bp   | GGGAGCACAGGTAAGTGCAT   |
| B-ACTIN-F        | AAATCTGGCACCACACCTTC   |
| B-ACTIN-R-95 bp  | GTTGGCCTTGGGGTTTCAG    |
| B-ACTIN-R-626 bp | AGAGGCGTACAGGGATAGCA   |
| B-ACTIN-R-703 bp | AGGGCATACCCTCGTAGAT    |
| B-ACTIN-R-828 bp | TAATGTCACGCACGATTTC    |
| B-ACTIN-R-983 bp | AGGCTGGAAGAGTGCCTCAG   |
